# Supplementary material for: Multi-omics data integration reveals novel drug targets in hepatocellular carcinoma
Source: PubMed Central journal article supplement (PMC8340535; doi:10.1186/s12864-021-07876-9), 2021-08-04

Figure S4

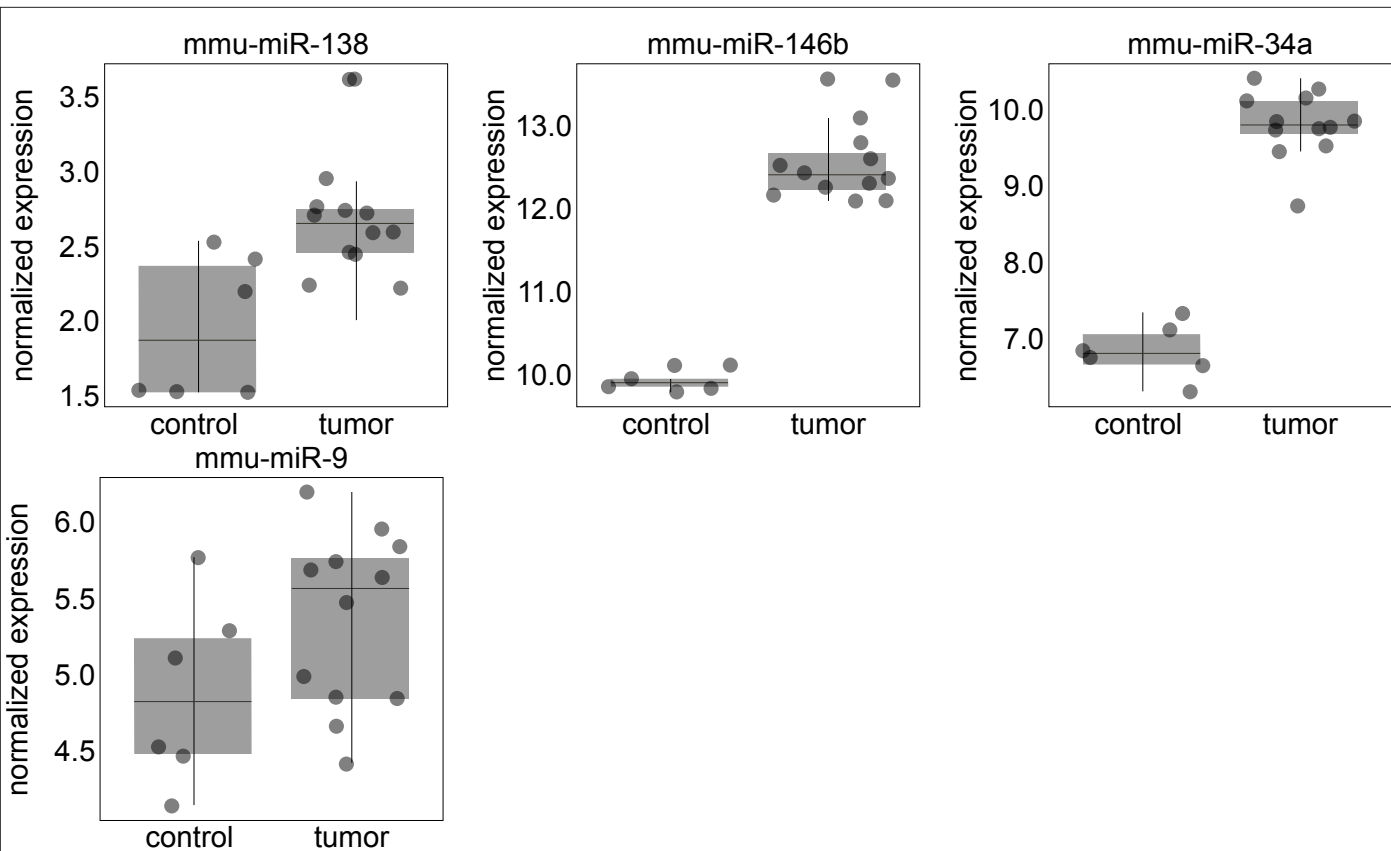

Supplement: 12864_2021_7876_MOESM4_ESM.pdf [file 12864_2021_7876_MOESM4_ESM.pdf]
