# Supplementary material for: Multi-omics data integration reveals novel drug targets in hepatocellular carcinoma
Source: PubMed Central journal article supplement (PMC8340535; doi:10.1186/s12864-021-07876-9), 2021-08-04
Supplement: 12864_2021_7876_MOESM5_ESM.pdf [file 12864_2021_7876_MOESM5_ESM.pdf]

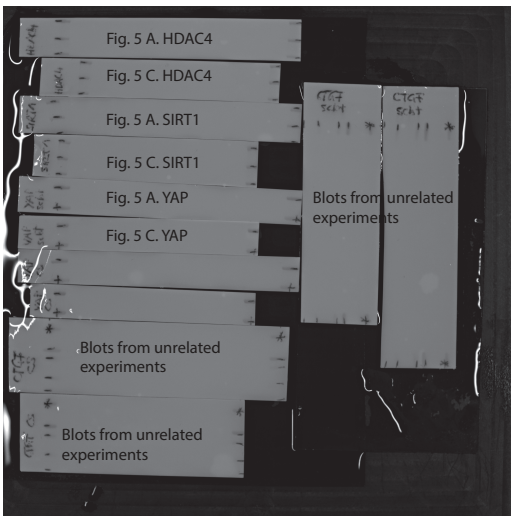

ctrl Tu  
1 2 3 4 5  
NT Tu NT Tu NT Tu NT Tu NT Tu

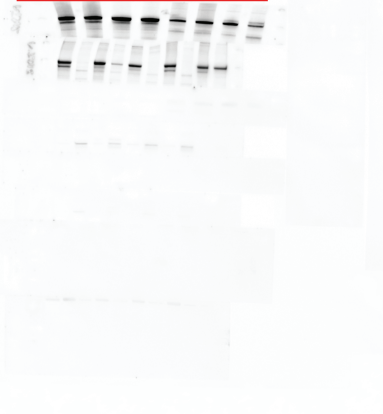

YAP

1 2 3 4 5  
NT Tu NT Tu NT Tu NT Tu NT Tu

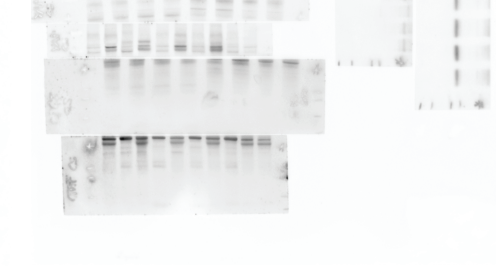

Fig. 5 A. SIRT1

Fig. 5 C. SIRT1

ctrl Tu  
1 2 3 4 5  
NT Tu NT Tu NT Tu NT Tu NT Tu

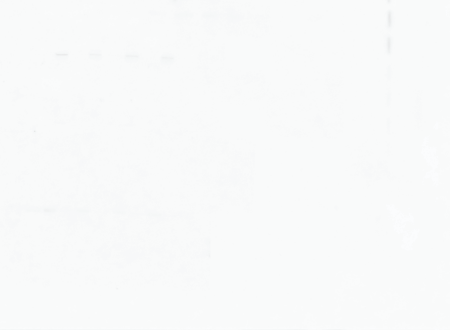

Fig. 5 A. YAP

ctrl Tu

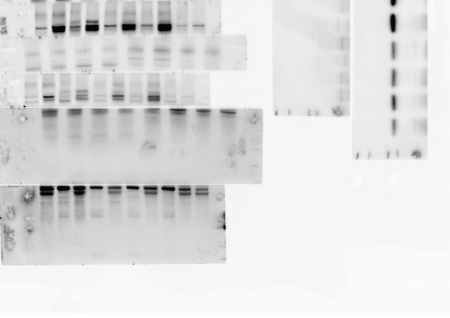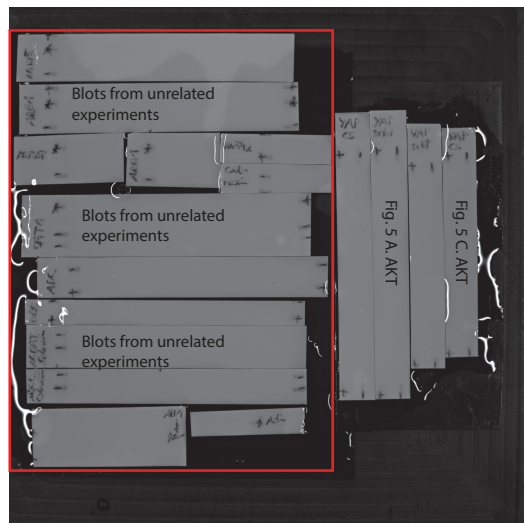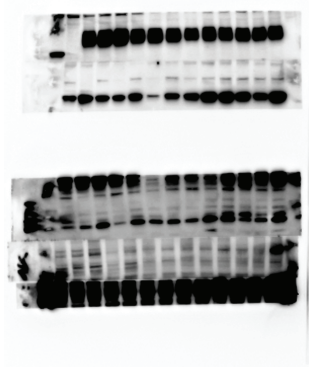

Fig. 5 A. AKT

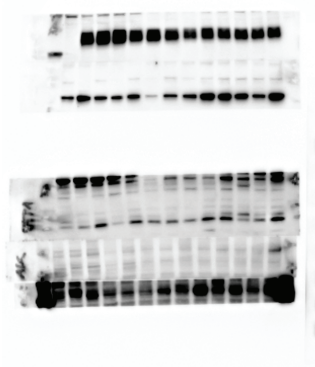

Fig. 5 C. AKT

YAP membranes stripped and re-probed for AKT
